# Supplementary material
Source: PubMed Central journal article supplement (PMC2718458)
Supplement: supp_172_12_1590__1.pdf [file supp_172_12_1590__1.pdf]

Association of Sleep Apnea and Type II Diabetes:  
a Population-based Study

Kevin J. Reichmuth MD, Diane Austin, MS, James B. Skatrud MD, Terry Young PhD

Online Supplement

*Wisconsin Sleep Cohort.* Full details can be found elsewhere<sup>1</sup>, but in brief, employees, ages 30-60 years, of 5 state agencies in south-central Wisconsin were initially surveyed in 1988 to create a defined sampling frame to undergo an extensive laboratory protocol. A weighted sampling scheme, with over sampling of habitual snorers was used to increase the variability in sleep-disordered breathing. When appropriate, the weighted sampling is accounted for in the analyses.

*Polysomnography measurements.* Polysomnographically-measured parameters included: electroencephalography, electrocardiography, electrooculography, and tibial electromyography. Noninvasive sensors measured oral airflow (end-tidal CO<sub>2</sub> gauge), nasal airflow (thermocouples), continuous pulse oximetry (Ohmeda 3740 Englewood, CO), and inductance plethysmography for thoracic and abdominal respiratory effort (Respirace, Ardsley, NY). Calculated parameters included the apnea-hypopnea index (AHI). Apnea was defined as cessation of airflow for at least 10 seconds and hypopnea was defined as a decrease in airflow with at least a 4% desaturation. Total sleep time (TST) was defined using the sleep staging criteria of Rechtschaffen and Kales<sup>2</sup>.

## References

- E1. Young, T., M. Palta, J. Dempsey, J. Skatrud, S. Weber, and S. Badr. The occurrence of sleep-disordered breathing among middle-aged adults. *N.Engl.J Med* 1993; 328:1230-1235
  
- E2. Rechtschaffen A and Kales A.A. A manual of standardized terminology techniques, and scoring system for sleep stages of human subjects. 1968. Public Health Service, Los Angeles, CA, U.S. Government Printing Office.
